# Supplementary material for: The Impacts of Sunlight on the Lichen Scots Pine Forest Community
Source: MDPI journal article supplement (doi:10.3390/f15040675), 2024-04-09
Supplement: s1 [file s1]

**Table S1 supp.** Result of stepwise multiple regression analysis for the effect of microhabitat parameters on the measurement of the photosynthetic activity (the maximal quantum yields of photosystem II – Fv/F<sub>M</sub>) of the study cryptogams species in aspect of daytime and seasons. Variables with significant effect ( $p < 0.05$ ) are provided in bold.

| Seasons | Species                  | Daytime and correlation coefficient                 | Variables              | B                | <i>t</i>        | <i>p</i>            |
|---------|--------------------------|-----------------------------------------------------|------------------------|------------------|-----------------|---------------------|
| Summer  | <i>Cladonia mitis</i>    | 9:00 am.:<br>R = 0.2405<br>R <sup>2</sup> = 0.0578  | Baseground temperature | -0.010576        | -1.65825        | p = 0.0985          |
|         |                          |                                                     | Light intensity        | <b>0.000005</b>  | <b>2.62078</b>  | <b>p = 0.0093</b>   |
|         |                          |                                                     | Tree height            | <b>0.001149</b>  | <b>2.51861</b>  | <b>p = 0.0124</b>   |
|         |                          | 12:00 am.:<br>R = 0.7654<br>R <sup>2</sup> = 0.5859 | Baseground temperature | <b>-0.041380</b> | <b>-7.53142</b> | <b>p &lt; 0.001</b> |
|         |                          |                                                     | Light intensity        | 0.000003         | 1.90672         | p = 0.0577          |
|         |                          |                                                     | Tree height            | -0.000347        | -0.92938        | p = 0.3536          |
|         |                          | 3:00 pm.:<br>R = 0.1236<br>R <sup>2</sup> = 0.0152  | Baseground temperature | 0.000128         | 0.04140         | p = 0.9670          |
|         |                          |                                                     | Light intensity        | 0.000001         | 0.45620         | p = 0.6486          |
|         |                          |                                                     | Tree height            | -0.000334        | -1.25939        | p = 0.2090          |
|         | <i>Cladonia uncialis</i> | 9:00 am.:<br>R = 0.3974<br>R <sup>2</sup> = 0.1579  | Baseground temperature | <b>-0.008665</b> | <b>-4.73353</b> | <b>p &lt; 0.001</b> |
|         |                          |                                                     | Light intensity        | <b>0.000002</b>  | <b>4.04792</b>  | <b>p &lt; 0.001</b> |
|         |                          |                                                     | Tree height            | <b>0.000597</b>  | <b>4.55988</b>  | <b>p &lt; 0.001</b> |
|         |                          | 12:00 am.:<br>R = 0.7674<br>R <sup>2</sup> = 0.5889 | Baseground temperature | <b>-0.018695</b> | <b>-2.47611</b> | <b>p = 0.0139</b>   |
|         |                          |                                                     | Light intensity        | <b>-0.000007</b> | <b>-3.30183</b> | <b>p = 0.0011</b>   |
|         |                          |                                                     | Tree height            | <b>-0.001266</b> | <b>-2.46631</b> | <b>p = 0.0143</b>   |
|         |                          | 3:00 pm.:<br>R = 0.7105<br>R <sup>2</sup> = 0.5049  | Baseground temperature | <b>-0.009755</b> | <b>-3.12862</b> | <b>p = 0.0019</b>   |
|         |                          |                                                     | Light intensity        | -0.000002        | -1.69155        | p = 0.0920          |
|         |                          |                                                     | Tree height            | 0.000102         | 0.38192         | p = 0.7028          |

Table S1 Supplementary data continued

| Seasons | Species                     | Daytime and correlation coefficient                 | Variables              | B                | <i>t</i>        | <i>p</i>            |
|---------|-----------------------------|-----------------------------------------------------|------------------------|------------------|-----------------|---------------------|
| Summer  | <i>Dicranum scoparium</i>   | 9:00 am.:<br>R = 0.4787<br>R <sup>2</sup> = 0.2292  | Baseground temperature | <b>-0.043232</b> | <b>-3.34512</b> | <b>p = 0.0009</b>   |
|         |                             |                                                     | Light intensity        | -0.000003        | -0.66591        | p = 0.5060          |
|         |                             |                                                     | Tree height            | <b>-0.002853</b> | <b>-3.08481</b> | <b>p = 0.0022</b>   |
|         |                             | 12:00 am.:<br>R = 0.6279<br>R <sup>2</sup> = 0.3943 | Baseground temperature | 0.018623         | 1.21605         | p = 0.2251          |
|         |                             |                                                     | Light intensity        | <b>-0.000027</b> | <b>-4.42515</b> | <b>p &lt; 0.001</b> |
|         |                             |                                                     | Tree height            | <b>-0.005173</b> | <b>-3.28685</b> | <b>p = 0.0011</b>   |
|         |                             | 3:00 pm.:<br>R = 0.6179<br>R <sup>2</sup> = 0.3818  | Baseground temperature | 0.005436         | 0.33920         | p = 0.7347          |
|         |                             |                                                     | Light intensity        | <b>-0.000022</b> | <b>-3.71203</b> | <b>p = 0.0002</b>   |
|         |                             |                                                     | Tree height            | <b>-0.005114</b> | <b>-3.71340</b> | <b>p = 0.0002</b>   |
|         | <i>Pleurozium schreberi</i> | 9:00 am.:<br>R = 0.5842<br>R <sup>2</sup> = 0.3413  | Baseground temperature | <b>-0.018907</b> | <b>-3.16076</b> | <b>p = 0.0017</b>   |
|         |                             |                                                     | Light intensity        | <b>0.000014</b>  | <b>7.65427</b>  | <b>p &lt; 0.001</b> |
|         |                             |                                                     | Tree height            | <b>0.001749</b>  | <b>4.08605</b>  | <b>p &lt; 0.001</b> |
|         |                             | 12:00 am.:<br>R = 0.3006<br>R <sup>2</sup> = 0.0903 | Baseground temperature | <b>-0.065571</b> | <b>-3.30870</b> | <b>p = 0.0010</b>   |
|         |                             |                                                     | Light intensity        | <b>0.000014</b>  | <b>2.63140</b>  | <b>p = 0.0090</b>   |
|         |                             |                                                     | Tree height            | <b>-0.005136</b> | <b>-3.81316</b> | <b>p = 0.0001</b>   |
|         |                             | 3:00 pm.:<br>R = 0.816<br>R <sup>2</sup> = 0.1456   | Baseground temperature | -0.013266        | -0.84715        | p = 0.3977          |
|         |                             |                                                     | Light intensity        | 0.000000         | 0.05494         | p = 0.9562          |
|         |                             |                                                     | Tree height            | <b>-0.007386</b> | <b>-5.48912</b> | <b>p &lt; 0.001</b> |

**Table S1 Supplementary data continued**

| Seasons | Species                  | Daytime and correlation coefficient                 | Variables              | B                | <i>t</i>        | <i>p</i>            |
|---------|--------------------------|-----------------------------------------------------|------------------------|------------------|-----------------|---------------------|
| Autumn  | <i>Cladonia mitis</i>    | 9:00 am.:<br>R = 0.6638<br>R <sup>2</sup> = 0.4406  | Baseground temperature | <b>0.060456</b>  | <b>5.35921</b>  | <b>p &lt; 0.001</b> |
|         |                          |                                                     | Light intensity        | <b>-0.000127</b> | <b>-8.17909</b> | <b>p &lt; 0.001</b> |
|         |                          |                                                     | Tree height            | <b>-0.001574</b> | <b>-3.38277</b> | <b>p = 0.0008</b>   |
|         |                          | 12:00 am.:<br>R = 0.3992<br>R <sup>2</sup> = 0.1593 | Baseground temperature | <b>0.007938</b>  | <b>2.85719</b>  | <b>p = 0.0046</b>   |
|         |                          |                                                     | Light intensity        | <b>-0.000008</b> | <b>-4.06892</b> | <b>p = 0.0001</b>   |
|         |                          |                                                     | Tree height            | <b>-0.001028</b> | <b>-4.61457</b> | <b>p &lt; 0.001</b> |
|         |                          | 3:00 pm.:<br>R = 0.4554<br>R <sup>2</sup> = 0.074   | Baseground temperature | <b>0.009677</b>  | <b>7.30242</b>  | <b>p &lt; 0.001</b> |
|         |                          |                                                     | Light intensity        | <b>-0.000001</b> | <b>-3.47203</b> | <b>p = 0.0006</b>   |
|         |                          |                                                     | Tree height            | 0.000042         | 0.38477         | p = 0.7007          |
|         | <i>Cladonia uncialis</i> | 9:00 am.:<br>R = 0.7571<br>R <sup>2</sup> = 0.5732  | Baseground temperature | <b>0.134976</b>  | <b>9.50280</b>  | <b>p &lt; 0.001</b> |
|         |                          |                                                     | Light intensity        | <b>-0.000170</b> | <b>-8.67264</b> | <b>p &lt; 0.001</b> |
|         |                          |                                                     | Tree height            | <b>-0.001231</b> | <b>-2.10101</b> | <b>p = 0.0366</b>   |
|         |                          | 12:00 am.:<br>R = 0.5147<br>R <sup>2</sup> = 0.2649 | Baseground temperature | <b>0.025865</b>  | <b>9.31552</b>  | <b>p &lt; 0.001</b> |
|         |                          |                                                     | Light intensity        | <b>-0.000011</b> | <b>-5.57535</b> | <b>p &lt; 0.001</b> |
|         |                          |                                                     | Tree height            | 0.000388         | 1.74206         | p = 0.0827          |
|         |                          | 3:00 pm.:<br>R = 0.4086<br>R <sup>2</sup> = 0.1669  | Baseground temperature | <b>0.010657</b>  | <b>4.02759</b>  | <b>p &lt; 0.001</b> |
|         |                          |                                                     | Light intensity        | <b>-0.000003</b> | <b>-4.05870</b> | <b>p &lt; 0.001</b> |
|         |                          |                                                     | Tree height            | <b>-0.001198</b> | <b>-5.54902</b> | <b>p &lt; 0.001</b> |

Table S1 Supplementary data continued

| Seasons | Species                     | Daytime and correlation coefficient                 | Variables              | B                | <i>t</i>        | <i>p</i>            |
|---------|-----------------------------|-----------------------------------------------------|------------------------|------------------|-----------------|---------------------|
| Autumn  | <i>Dicranum scoparium</i>   | 9:00 am.:<br>R = 0.5183<br>R <sup>2</sup> = 0.2686  | Baseground temperature | 0.000369         | 0.26236         | p = 0.7932          |
|         |                             |                                                     | Light intensity        | <b>-0.000016</b> | <b>-8.16619</b> | <b>p &lt; 0.001</b> |
|         |                             |                                                     | Tree height            | -0.000058        | -1.00383        | p = 0.3164          |
|         |                             | 12:00 am.:<br>R = 0.5063<br>R <sup>2</sup> = 0.2563 | Baseground temperature | <b>-0.004903</b> | <b>-7.32423</b> | <b>p &lt; 0.001</b> |
|         |                             |                                                     | Light intensity        | <b>0.000003</b>  | <b>6.17684</b>  | <b>p &lt; 0.001</b> |
|         |                             |                                                     | Tree height            | <b>0.000154</b>  | <b>2.86162</b>  | <b>p = 0.0045</b>   |
|         |                             | 3:00 pm.:<br>R = 0.5683<br>R <sup>2</sup> = 0.3230  | Baseground temperature | 0.000451         | 0.12722         | p = 0.8988          |
|         |                             |                                                     | Light intensity        | <b>-0.000007</b> | <b>-6.17812</b> | <b>p &lt; 0.001</b> |
|         |                             |                                                     | Tree height            | <b>0.001680</b>  | <b>5.80343</b>  | <b>p &lt; 0.001</b> |
|         | <i>Pleurozium schreberi</i> | 9:00 am.:<br>R = 0.8058<br>R <sup>2</sup> = 0.6493  | Baseground temperature | <b>0.043603</b>  | <b>4.3695</b>   | <b>p &lt; 0.001</b> |
|         |                             |                                                     | Light intensity        | <b>-0.000218</b> | <b>-15.8678</b> | <b>p &lt; 0.001</b> |
|         |                             |                                                     | Tree height            | <b>0.000983</b>  | <b>2.3877</b>   | <b>p = 0.0177</b>   |
|         |                             | 12:00 am.:<br>R = 0.2623<br>R <sup>2</sup> = 0.0688 | Baseground temperature | -0.008440        | -0.829590       | p = 0.4075          |
|         |                             |                                                     | Light intensity        | 0.000006         | 0.803644        | p = 0.4223          |
|         |                             |                                                     | Tree height            | <b>0.003107</b>  | <b>3.809669</b> | <b>p = 0.0001</b>   |
|         |                             | 3:00 pm.:<br>R = 0.1026<br>R <sup>2</sup> = 0.0105  | Baseground temperature | -0.005679        | -0.683037       | p = 0.4952          |
|         |                             |                                                     | Light intensity        | 0.000002         | 0.691906        | p = 0.4896          |
|         |                             |                                                     | Tree height            | 0.000979         | 1.442622        | p = 0.1504          |

Table S1 Supplementary data continued

| Seasons | Species                  | Daytime and correlation coefficient                 | Variables              | B                | <i>t</i>        | <i>p</i>            |
|---------|--------------------------|-----------------------------------------------------|------------------------|------------------|-----------------|---------------------|
| Winter  | <i>Cladonia mitis</i>    | 9:00 am.:<br>R = 0.3663<br>R <sup>2</sup> = 0.1341  | Baseground temperature | 0.000439         | 0.2047          | p = 0.8379          |
|         |                          |                                                     | Light intensity        | 0.000000         | 0.0638          | p = 0.9491          |
|         |                          |                                                     | Tree height            | <b>0.000409</b>  | <b>5.9844</b>   | <b>p &lt; 0.001</b> |
|         |                          | 12:00 am.:<br>R = 0.7276<br>R <sup>2</sup> = 0.5294 | Baseground temperature | <b>0.066059</b>  | <b>11.1884</b>  | <b>p &lt; 0.001</b> |
|         |                          |                                                     | Light intensity        | <b>-0.000046</b> | <b>-16.4680</b> | <b>p &lt; 0.001</b> |
|         |                          |                                                     | Tree height            | -0.000123        | -0.2795         | p = 0.7800          |
|         |                          | 3:00 pm.:<br>R = 0.7428<br>R <sup>2</sup> = 0.5518  | Baseground temperature | <b>0.36809</b>   | <b>10.20857</b> | <b>p &lt; 0.001</b> |
|         |                          |                                                     | Light intensity        | <b>0.00004</b>   | <b>12.15072</b> | <b>p &lt; 0.001</b> |
|         |                          |                                                     | Tree height            | 0.00057          | 1.17339         | p = 0.2417          |
|         | <i>Cladonia uncialis</i> | 9:00 am.:<br>R = 0.5712<br>R <sup>2</sup> = 0.3263  | Baseground temperature | <b>0.049071</b>  | <b>9.51578</b>  | <b>p &lt; 0.001</b> |
|         |                          |                                                     | Light intensity        | <b>0.000069</b>  | <b>6.19748</b>  | <b>p &lt; 0.001</b> |
|         |                          |                                                     | Tree height            | <b>0.001132</b>  | <b>6.89084</b>  | <b>p &lt; 0.001</b> |
|         |                          | 12:00 am.:<br>R = 0.3567<br>R <sup>2</sup> = 0.1272 | Baseground temperature | <b>0.026121</b>  | <b>5.29344</b>  | <b>p &lt; 0.001</b> |
|         |                          |                                                     | Light intensity        | <b>-0.000013</b> | <b>-5.72590</b> | <b>p &lt; 0.001</b> |
|         |                          |                                                     | Tree height            | -0.000384        | -1.04241        | p = 0.2982          |
|         |                          | 3:00 pm.:<br>R = 0.7825<br>R <sup>2</sup> = 0.6124  | Baseground temperature | <b>0.170669</b>  | <b>10.86229</b> | <b>0.000000</b>     |
|         |                          |                                                     | Light intensity        | <b>0.000019</b>  | <b>13.21218</b> | <b>0.000000</b>     |
|         |                          |                                                     | Tree height            | <b>-0.000631</b> | <b>-2.95517</b> | <b>0.003431</b>     |

Table S1 Supplementary data continued

| Seasons | Species                     | Daytime and correlation coefficient                 | Variables              | B                | <i>t</i>        | <i>p</i>            |
|---------|-----------------------------|-----------------------------------------------------|------------------------|------------------|-----------------|---------------------|
| Winter  | <i>Dicranum scoparium</i>   | 9:00 am.:<br>R = 0.7887<br>R <sup>2</sup> = 0.6221  | Baseground temperature | <b>-0.004949</b> | <b>-2.2063</b>  | <b>p = 0.0282</b>   |
|         |                             |                                                     | Light intensity        | <b>-0.000093</b> | <b>-19.2199</b> | <b>p &lt; 0.001</b> |
|         |                             |                                                     | Tree height            | -0.000033        | -0.4646         | p = 0.6426          |
|         |                             | 12:00 am.:<br>R = 0.6996<br>R <sup>2</sup> = 0.4895 | Baseground temperature | <b>0.035744</b>  | <b>3.5340</b>   | <b>p = 0.0004</b>   |
|         |                             |                                                     | Light intensity        | <b>-0.000061</b> | <b>-12.5451</b> | <b>p &lt; 0.001</b> |
|         |                             |                                                     | Tree height            | -0.000398        | -0.5272         | p = 0.5985          |
|         |                             | 3:00 pm.:<br>R = 0.7916<br>R <sup>2</sup> = 0.6267  | Baseground temperature | <b>0.38369</b>   | <b>11.42525</b> | <b>p &lt; 0.001</b> |
|         |                             |                                                     | Light intensity        | <b>0.00004</b>   | <b>13.14660</b> | <b>p &lt; 0.001</b> |
|         |                             |                                                     | Tree height            | <b>-0.00163</b>  | <b>-3.58509</b> | <b>p = 0.0004</b>   |
|         | <i>Pleurozium schreberi</i> | 9:00 am.:<br>R = 0.2253<br>R <sup>2</sup> = 0.507   | Baseground temperature | 0.000067         | 0.0403          | p = 0.9678          |
|         |                             |                                                     | Light intensity        | -0.000001        | -0.3219         | p = 0.7478          |
|         |                             |                                                     | Tree height            | <b>-0.000185</b> | <b>-3.4787</b>  | <b>p = 0.0005</b>   |
|         |                             | 12:00 am.:<br>R = 0.6215<br>R <sup>2</sup> = 0.3862 | Baseground temperature | <b>0.052825</b>  | <b>9.3179</b>   | <b>p &lt; 0.001</b> |
|         |                             |                                                     | Light intensity        | <b>-0.000033</b> | <b>-12.3866</b> | <b>p &lt; 0.001</b> |
|         |                             |                                                     | Tree height            | -0.000511        | -1.2077         | p = 0.2283          |
|         |                             | 3:00 pm.:<br>R = 0.8660<br>R <sup>2</sup> = 0.500   | Baseground temperature | <b>0.63997</b>   | <b>13.2507</b>  | <b>p &lt; 0.001</b> |
|         |                             |                                                     | Light intensity        | <b>0.00009</b>   | <b>20.5047</b>  | <b>p &lt; 0.001</b> |
|         |                             |                                                     | Tree height            | -0.00119         | -1.8176         | p = 0.0703          |
